# Supplementary material
Source: PubMed Central journal article supplement (PMC9272856)

## **Supplementary material**

### **Journal: Clinical Drug Investigation**

#### **Paxlovid-Tacrolimus Drug-Drug Interaction in a 23-Year Old Female Kidney Transplant Patient with COVID-19**

#### **Short title: Paxlovid-Tacrolimus drug-drug interaction in a kidney transplant patient with Covid-19**

\*Noa Berar Yanay MD<sup>1,2</sup>, Ido Bogner MD<sup>1,2</sup>, Khader Saker MD<sup>1</sup>, Elias Tannous BSc. Pharm, MSc. Clinical Pharmacy<sup>3,4</sup>

1. Nephrology Department Hillel Yaffe Medical Center, Hadera Israel
2. Faculty of Medicine Technion Institute, Haifa Israel
3. Pharmacy Services Hillel Yaffe Medical Center, Hadera Israel
4. Faculty of Health Sciences. Department of Clinical Microbiology and Pharmacology, Ben Gurion University of the Negev, Beer Sheba Israel.

\*Corresponding author

Noa Berar Yanay

Nephrology Department, Hillel Yaffe Medical Center , POB 169 Hadera Israel 38100

[noab@hy.health.gov.il](mailto:noab@hy.health.gov.il)

<tel:+972506246794>

fax: +97247744819

## Supplementary Material

### The prior model used for Bayesian maximum a posteriori probability (MAP):

1- Mean values of pharmacokinetic parameters adjusted to fat free mass (FFM)

Clearance (CL) = 11.3 L/h

Volume of Central compartment (Vc) = 82.23 L

Intercompartmental clearance (Q) = 15.8 L/h

Absorption rate = 1.01 h<sup>-1</sup>

Volume of Peripheral compartment= 422.73L

Lag time on absorption= 0.41 h

Clearance, Volume of Central compartment and Intercompartmental clearance were modeled as random effects, and absorption rate, Volume of Peripheral compartment were modeled as fixed effects.

2-  $\Omega$  matrix ( Variance-covariance matrix for random effects)

|      |      |      |
|------|------|------|
| 0.63 |      |      |
| 0.29 | 0.73 |      |
| 0.44 | 0    | 0.79 |

Elements on the diagonal are variances of CL [1,1] ,Vc [2,2] and Q [3,3]. Elements [2,1] and [3,1], are the covariance of CL with Vc, CL with Q, respectively.

## R code for bayseian MAP estimation:

```
library(MASS)
library(mrgsolve)
library(mapbayr)

code <- "
$PARAM @annotated
TVCL: 11.3 : Clearance
TVVC: 82.23 : Central volume
V2 : 422.73 : Peripheral volume of distribution
TVQ : 15.8 : Intercompartmental clearance
KA : 1.01 : Absorption rate (h-1)
TVALAG1: 0.41 : lag time on absorption

ETA1: 0 : Clearance (L/h)
ETA2: 0 : Central volume (L)
ETA3: 0: Intercompartmental clearance

$OMEGA @block
0.63
0.29 0.73
0.44 0 0.79

$SIGMA
0.149 // proportional
0 // additive
$CMT @annotated
DEPOT : Depot () [ADM]
CENTRAL: Central (mcg/L) [OBS]
PERIPH: Peripheral compartment ()
$TABLE
double DV = (CENTRAL/VC) * (1 + EPS(1)) + EPS(2);

$MAIN
double CL = TVCL * exp(ETA1 + ETA(1)) ;
double VC = TVVC * exp(ETA(2) + ETA2) ;
double Q = TVQ * exp(ETA(3) + ETA3) ;

double K12 = Q / VC ;
double K21 = Q / V2 ;

double K10 = CL / VC ;
$ODE
dxdt_CENTRAL = KA * DEPOT+ K21 * PERIPH - (K10 + K12) * CENTRAL ;
dxdt_PERIPH = K12 * CENTRAL - K21 * PERIPH ;
dxdt_DEPOT = -KA * DEPOT;
$CAPTURE DV CL VC Q
"

my_model <- mcode("tac", code)
## Building tac ... done.
my_est <- my_model %>%
  adm_lines(time = 0, amt = 1500) %>%
  adm_lines(time = 12, amt = 1500) %>%
  adm_lines(time = 24, amt = 1000) %>%
  adm_lines(time = 48, amt = 1000) %>%
  adm_lines(time = 60, amt = 1000) %>%
  adm_lines(time = 72, amt = 1000) %>%
  adm_lines(time = 84, amt = 1000) %>%
```

```
adm_lines(time = 96, amt = 500) %>%
adm_lines(time = 108, amt = 500) %>%
adm_lines(time = 120, amt = 500) %>%
adm_lines(time = 144, amt = 500) %>%
obs_lines(time = 71, DV = 48.5) %>%
obs_lines(time = 95, DV = 100) %>%
obs_lines(time = 119, DV = 85.8) %>%
obs_lines(time = 143, DV = 62) %>%
mapbayest()
plot(my_est)
```

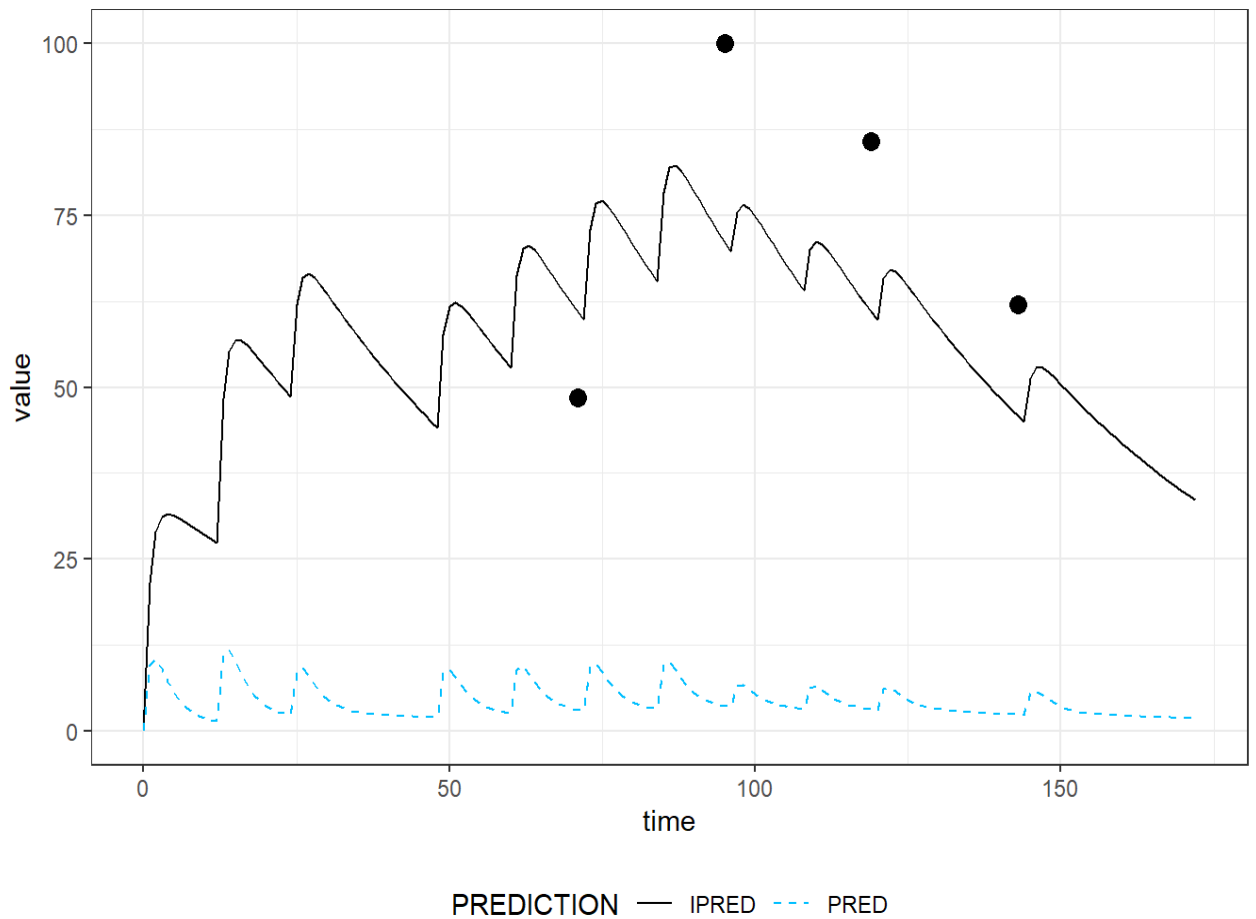

Supplement: 40261_2022_1180_MOESM1_ESM.pdf [file 40261_2022_1180_MOESM1_ESM.pdf]
